# Supplementary material for: T cell anergy in perinatal mice is promoted by T reg cells and prevented by IL-33
Source: PubMed Central journal article supplement — J Exp Med. 2019 Apr 15;216(6):1328–44. doi: 10.1084/jem.20182002 (PMC6547863; doi:10.1084/jem.20182002), 2019-04-15
Supplement: JEM_20182002_sm.pdf [file JEM_20182002_sm.pdf]

Supplemental material

Tuncel et al., <https://doi.org/10.1084/jem.20182002>

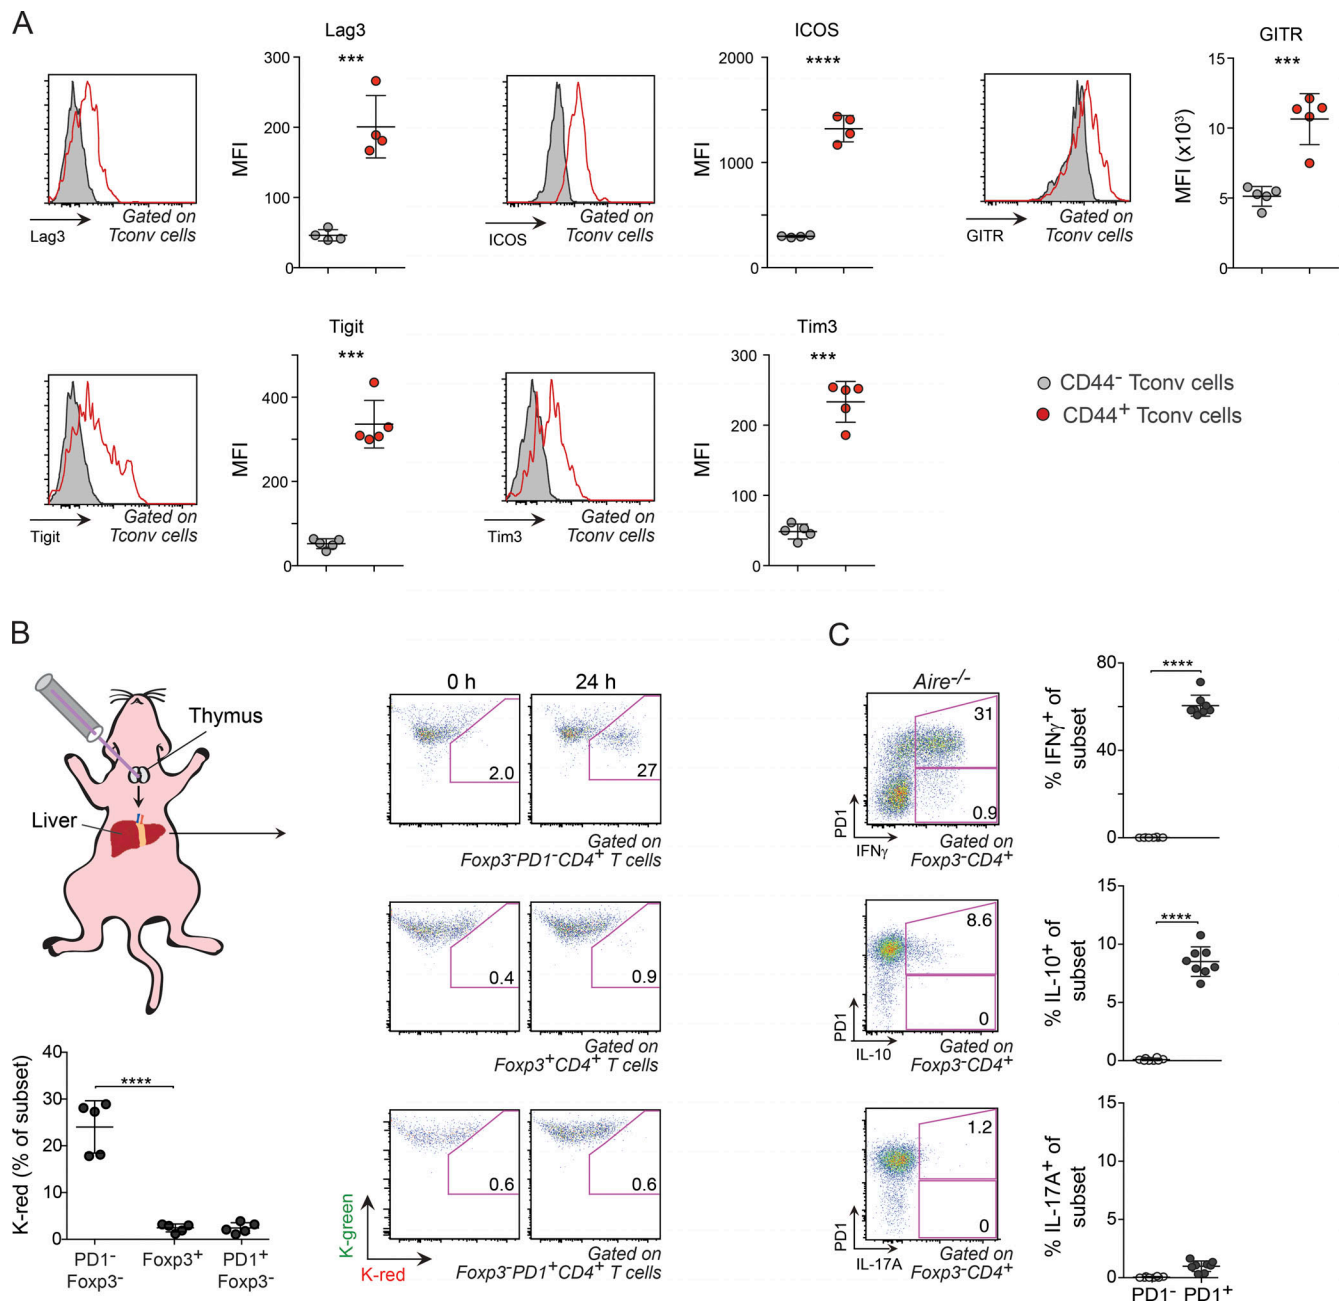

Figure S1. **Phenotype and origin of effector T cells in liver of *Aire*<sup>-/-</sup> perinates.** (A) Expression of signaling and costimulatory receptors on perinatal liver CD44<sup>+</sup> T conv cells. Representative histograms and summarizing mean fluorescence intensity (MFI) data from flow cytometric analyses of liver T conv cells from 12-d-old *Aire*<sup>-/-</sup> mice (*n* = 4 mice/group). (B) Naive T conv cells constituted the majority of newly exported CD4<sup>+</sup> thymocytes in the liver of 5-d-old mice. Thymocytes were tagged in 4-d-old *Kaede*/B6.*Aire*<sup>-/-</sup> mice through light exposure. 24 h later, the proportion of tagged (photoconverted) CD4<sup>+</sup> T cells was determined in the liver. Right: Pseudocolor plots show representative examples of photoconverted naive (PD-1<sup>-</sup>) T conv cells, Foxp3<sup>+</sup> cells, and PD-1<sup>+</sup> T conv cells. Bottom: Summary of frequency data (*n* = 5 mice/group). (C) Cytokine production by PD-1<sup>-</sup> and PD-1<sup>+</sup> liver T conv cells. Flow-cytometric pseudocolor plots and summary data of IFN $\gamma$ <sup>+</sup>, IL-10<sup>+</sup>, and IL-17A<sup>+</sup>-producing T conv cells from the liver of 8-d-old *Aire*<sup>-/-</sup> mice (*n* = 8 mice/group). Data are pooled from at least two independent experiments. Data are shown as mean  $\pm$  SD. \*\*\*, *P*  $\leq$  0.001; \*\*\*\*, *P*  $\leq$  0.0001 (Student's *t* test).

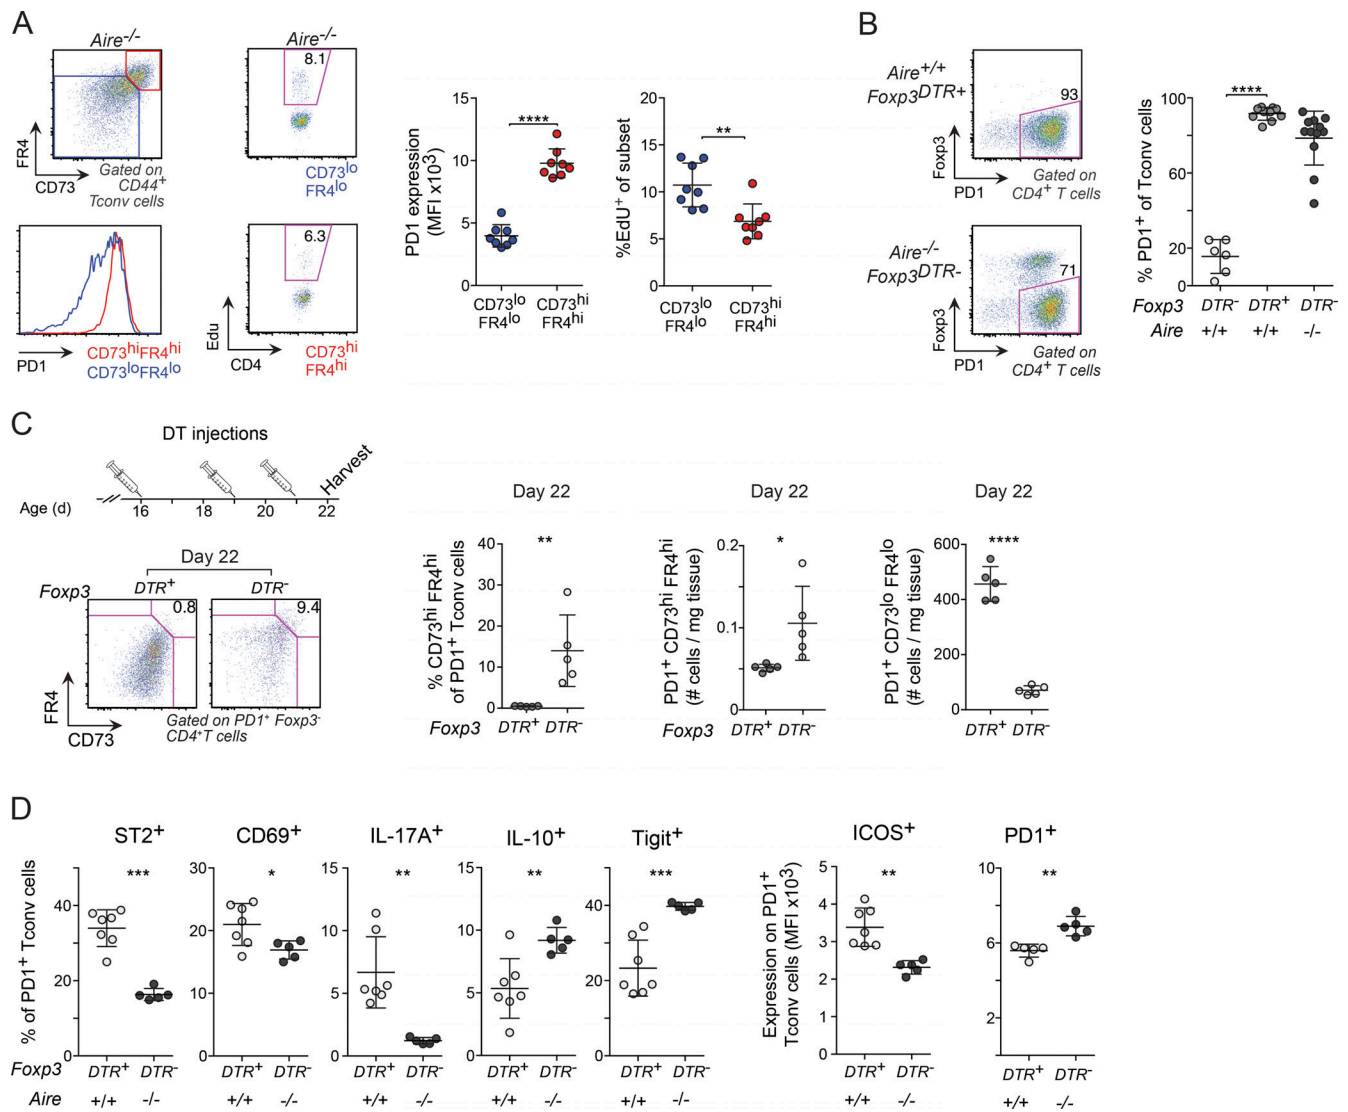

Figure S2. **Phenotypes of effector and anergic cells in *Aire*<sup>-/-</sup> and T reg cell-depleted perinates.** (A) Upper left: Gating strategy of anergic (red) and effector (blue) CD44<sup>+</sup> T conv cells from the liver of 10-d-old *Aire*<sup>-/-</sup> mice. Lower left: Representative histogram of PD-1 expression. Center left: Representative flow-cytometric plots with gates depicting proliferating (Edu<sup>+</sup>) effector (top) and anergic (bottom) cells in liver from 12-d-old *Aire*<sup>-/-</sup> mice, analyzed 4 h after Edu injection. Center and far right: Summary of PD-1 mean fluorescence intensity (MFI) and percentage Edu<sup>+</sup> cells (*n* = 8 mice/group). (B) Frequency of PD-1<sup>+</sup> T conv cells in the liver of 10-d-old *Foxp3*<sup>DTR+</sup> and *Foxp3*<sup>DTR-</sup> perinates after treatment with DT on days 3, 5, and 7 after birth. Left: Representative flow-cytometric plots of CD4<sup>+</sup> T cells. Right: Summary of percentage PD-1 (*n* = 6–12 mice/group). (C) Frequency and number of anergic and effector cells in T reg cell-depleted perinates. Upper left: Treatment regimen for DT injection. Bottom left and right: Representative flow-cytometric plots and summary data (*n* = 5 mice/group). (D) PD-1<sup>+</sup> T conv cells in T reg cell-depleted perinates were phenotypically distinct from PD-1<sup>+</sup> T conv cells in *Aire*<sup>-/-</sup> mice. Frequencies of cytokine- (after stimulation with phorbol myristate acetate and ionomycin) and cell surface-expressing liver PD-1<sup>+</sup> T conv cells of 10-d-old *Aire*<sup>+/+</sup>*Foxp3*<sup>DTR+</sup> and *Aire*<sup>-/-</sup>*Foxp3*<sup>DTR-</sup> mice (treated with DT as in B) as determined by flow cytometry (*n* = 5–7 mice/group). Data are pooled from at least two independent experiments and show mean ± SD. Statistical analyses as in Fig. S1. \*, *P* ≤ 0.05; \*\*, *P* ≤ 0.01; \*\*\*, *P* ≤ 0.001; \*\*\*\*, *P* ≤ 0.0001.

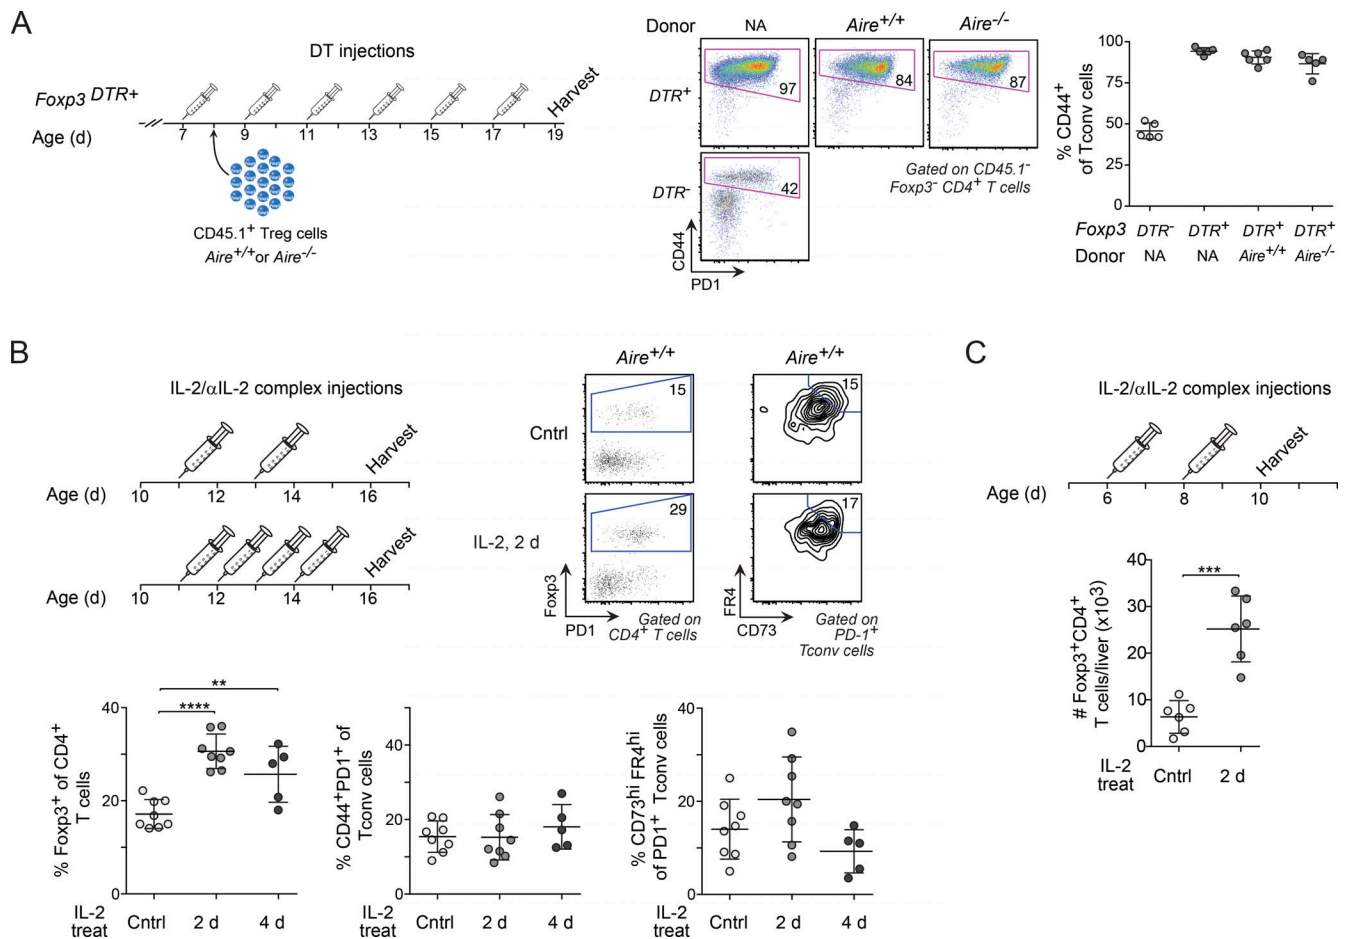

Figure S3. **Impact of T reg cells on effector cell differentiation and the abundance of anergic cells in the perinatal liver. (A)** Frequency of CD44<sup>+</sup> T conv cells. Left: Regimen for adoptive T reg cell-transfer and DT treatment. Right: Representative flow-cytometric plots and summary data ( $n = 5-6$  mice/group). **(B)** Treatment with IL-2 increased the number of T reg cells in the liver without affecting the proportion of anergic cells. *Aire*<sup>+/+</sup> mice were treated with low doses of IL-2/anti-IL-2 mAb complexes daily or every second day between days 11 and 14 after birth, after which the proportions of various CD4<sup>+</sup> T cell subsets (as indicated) were determined on day 16. Upper left: Treatment regimen. Upper right: Representative flow-cytometric dot and contour plots of total CD4<sup>+</sup> T cells and PD-1<sup>+</sup> T conv cells in treated and control (vehicle alone) mice. Bottom: Summary data for percentages of T reg cells, CD44<sup>+</sup>PD-1<sup>+</sup> T conv cells, and anergic cells ( $n = 5-8$  mice/group). **(C)** Number of T reg cells in 10-d-old *Aire*<sup>+/+</sup> mice after two injections of IL-2/anti-IL-2 mAb complexes on days 6 and 8 after birth (using the same dose of cytokine/antibodies as in B;  $n = 6$  mice/group). Data are pooled from at least two independent experiments and show mean  $\pm$  SD. Statistical analyses as in Fig. S1. \*\*,  $P \leq 0.01$ ; \*\*\*,  $P \leq 0.001$ ; \*\*\*\*,  $P \leq 0.0001$ .

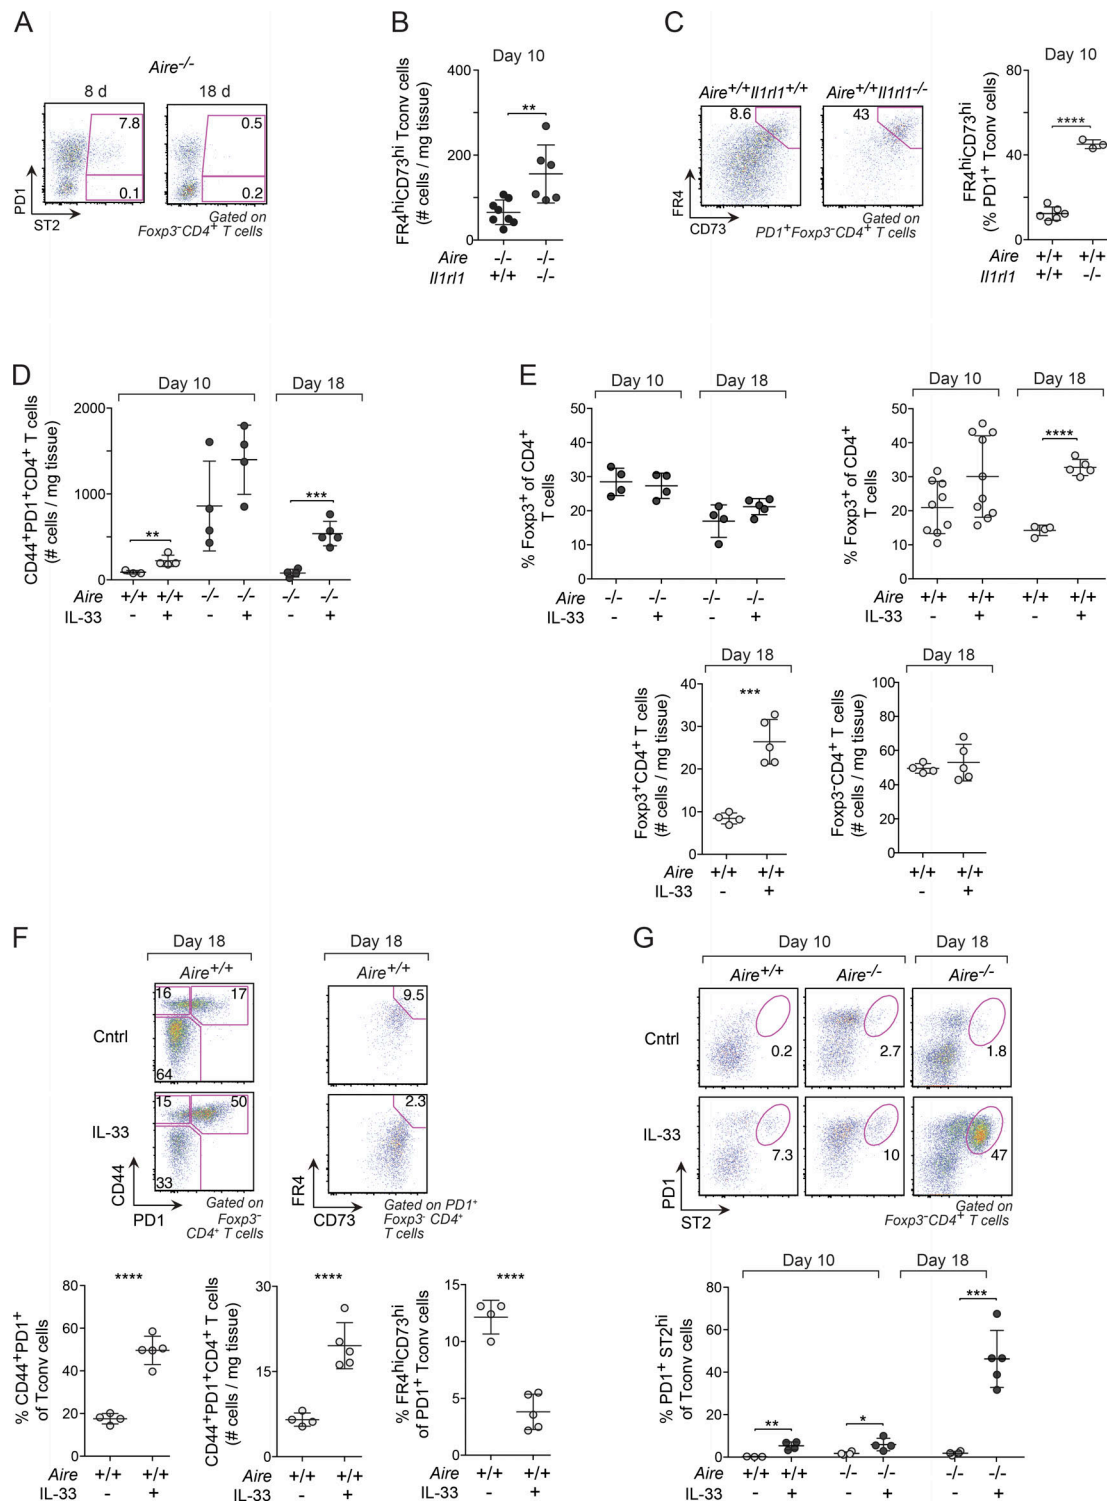

**Figure S4. IL-33 inhibited anergy but promoted T reg cell proliferation and ST2 expression by liver T conv cells.** (A) Representative flow-cytometric plots of T conv cells from 8–18-d-old *Aire*<sup>-/-</sup> mice (see Fig. 7 A for summary data of ST2<sup>+</sup>PD-1<sup>-</sup> and ST2<sup>+</sup>PD-1<sup>+</sup> frequencies). (B and C) Impact of ST2 deficiency on the number ( $n = 6–8$  mice/group; B) and frequency ( $n = 3–6$  mice/group; C) of anergic cells in 10-d-old *Aire*<sup>-/-</sup> (B) and *Aire*<sup>+/+</sup> mice (C). (D) Number of CD44<sup>+</sup>PD-1<sup>+</sup> T conv cells after treatment with rIL-33 (see Fig. 7 E for treatment regimen). Days 10 and 18, as indicated on top of the scatter plots, represent the days of harvest ( $n = 4–5$  mice/group). (E) Frequency and number of liver T reg cells in mice treated with rIL-33. Top: Frequency of T reg cells in *Aire*<sup>-/-</sup> (left) and *Aire*<sup>+/+</sup> (right) mice (treated with rIL-33 as in Fig. 7 E). Bottom: Number of T reg cells (left) and T conv (right) cells in *Aire*<sup>-/-</sup> mice treated with rIL-33 ( $n = 4–10$  mice/group). (F) Impact of rIL-33 treatment on total and anergic liver CD44<sup>+</sup>PD-1<sup>+</sup> T conv cells in 18-d-old *Aire*<sup>+/+</sup> mice ( $n = 4–5$  mice/group; see Fig. 7 E for treatment regimen). (G) Frequency of ST2<sup>+</sup> T conv cells in mice treated with rIL-33. Top: Representative flow-cytometric plots. Bottom: Summary data ( $n = 3–5$  mice/group). Data are pooled from at least two independent experiments and show mean  $\pm$  SD. Statistical analyses as in Fig. S1. \*\*,  $P \leq 0.01$ ; \*\*\*,  $P \leq 0.001$ ; \*\*\*\*,  $P \leq 0.0001$ .

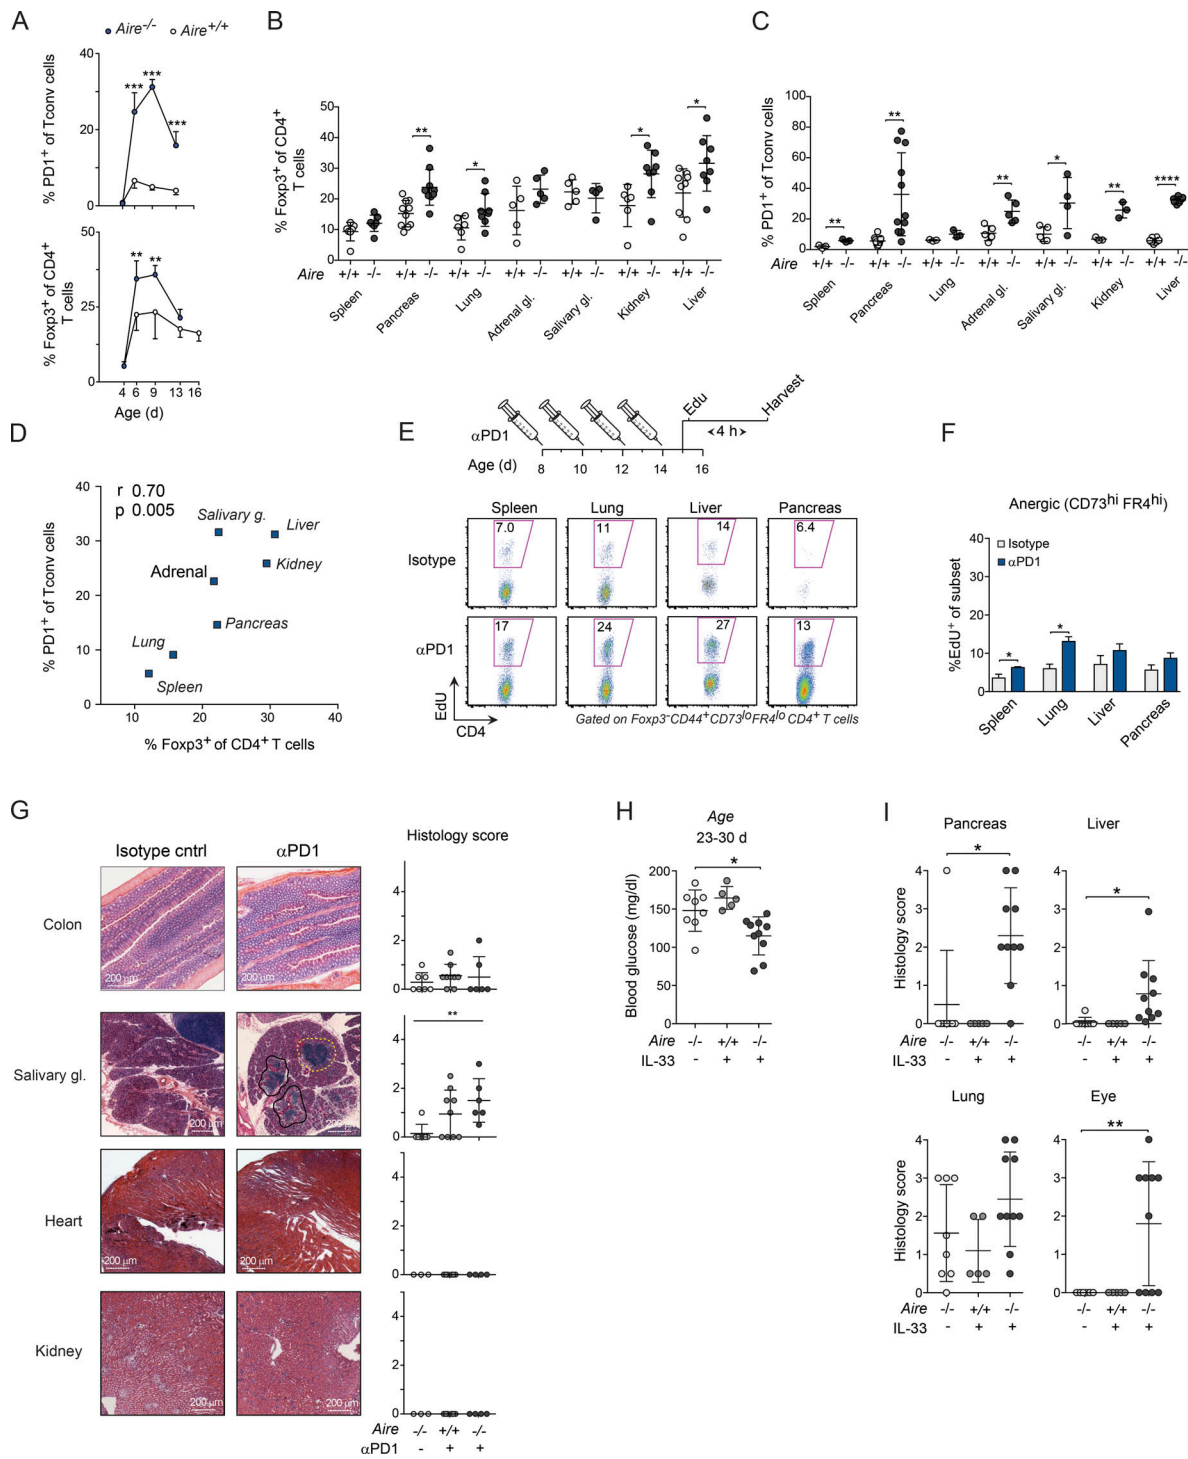

**Figure S5. Impact of inhibiting PD-1 or stimulating ST2 signaling on T cell proliferation and autoimmunity in NOD perinates. (A–D)** PD-1<sup>+</sup> T conv cells were enriched in several nonlymphoid organs of NOD.*Aire*<sup>-/-</sup> perinates. **(A)** Frequencies of PD-1<sup>+</sup> T conv cells (top) and T reg cells (bottom; gated as in Figs. 1 C and 2 A, respectively) from liver of NOD.*Aire*<sup>-/-</sup> and *Aire*<sup>+/+</sup> littermates of various ages (*n* = 4–9 mice/group). **(B and C)** Proportions of T reg (B) and PD-1<sup>+</sup> T conv (C) cells in the spleen and nonlymphoid organs of 8–10-d-old NOD.*Aire*<sup>-/-</sup> and *Aire*<sup>+/+</sup> littermates (*n* = 3–11 mice/group). **(D)** Correlation between frequencies of T reg cells (x axis) and PD-1<sup>+</sup> T conv cells (y axis) in the spleen and nonlymphoid organs of 8–10-d-old NOD.*Aire*<sup>-/-</sup> mice (median values of data shown in B and C; *n* = 3–9 mice/group). **(E)** Proliferation of CD44<sup>+</sup>CD73<sup>lo</sup>FR4<sup>lo</sup> T conv cells from various organs of 15-d-old NOD.*Aire*<sup>-/-</sup> mice treated with an αPD-1 blocking mAb (or an isotype-matched control mAb) between days 8 and 14 after birth. Cells were analyzed 4 h after EdU injection (data are summarized in Fig. 9 A). **(F)** Corresponding summary data (as in Fig. 9 A) for cells with an anergic phenotype (gated as in Fig. 5 A; *n* = 3–6 mice/group). **(G)** Data from the same experiment as that depicted in Fig. 9, C and D (*n* = 6–9 mice/group). Scale bars, 200 μm. **(H)** Blood-glucose levels in NOD.*Aire*<sup>-/-</sup> mice treated with rIL-33 as compared with controls (vehicle treated; *n* = 5–10 mice/group). **(I)** Histological scores related to data depicted in Fig. 9 E (*n* = 5–10 mice/group). Data are pooled from at least two independent experiments and show mean ± SD. Statistical analyses as in Fig. S1. \*, *P* ≤ 0.05; \*\*, *P* ≤ 0.01; \*\*\*, *P* ≤ 0.001; \*\*\*\*, *P* ≤ 0.0001.
